# Supplementary material
Source: ML conference proceedings conference paper supplement (https://openreview.net/forum?id=qVtbqSwOxy6)
Supplement: supplementary_material [file attachment]

---

# Supplementary Materials For Submission 228

---

Anonymous Author(s)

## A Appendix

### A.1 Details of Algorithms

The optimization problem is rewritten as,

$$\max_{\mathbf{P}} \text{Tr}(\mathbf{Z}_1^\top \mathbf{Z}_2 \mathbf{P} + \lambda \mathbf{S}_1^\top \mathbf{P}^\top \mathbf{S}_2 \mathbf{P}), \text{ s.t. } \mathbf{P} \mathbf{1} = \mathbf{1}, \mathbf{P}^\top \mathbf{1} = \mathbf{1}, \mathbf{P} \in [0, 1]^{m \times m}, \quad (1)$$

We refer Eq. (1) as the multi-view anchor correspondence framework. To efficiently solve Eq. (1), we adopt the Projected Fixed-Point Algorithm to update  $\mathbf{P}$  as follows,

$$\mathbf{P}^{(t+1)} = (1-\alpha)\mathbf{P}^{(t)} + \alpha \mathbf{\Gamma} \left( \nabla f \left( \mathbf{P}^{(t)} \right) \right) = (1-\alpha)\mathbf{P}^{(t)} + \alpha \mathbf{\Gamma} (\mathbf{K}^\top + 2\lambda \mathbf{S}_2 \mathbf{P}^{(t)} \mathbf{S}_1^\top), \alpha \in [0, 1], \quad (2)$$

where  $\alpha$  is the step size parameter,  $t$  denotes the number of iterations and  $\mathbf{\Gamma}$  denotes the double stochastic projection operator. The convergence of the algorithm has been proved, and we set  $\alpha = 0.5$  in this paper.

The  $\mathbf{\Gamma}$  representing the double stochastic projection operator for given matrix  $\mathbf{Q} = (\nabla f(\mathbf{P}^{(t)}))$ , where follows [1] with two-step projection as follows,

$$\mathbf{\Gamma}_1(\mathbf{Q}) = \arg \min_{\mathbf{Q}_1} \|\mathbf{Q} - \mathbf{Q}_1\|_{\mathbf{F}}, \text{ s.t. } \mathbf{Q}_1 \mathbf{1} = \mathbf{1}, \mathbf{Q}_1^\top \mathbf{1} = \mathbf{1}. \quad (3)$$

and then the second step is that,

$$\mathbf{\Gamma}_2(\mathbf{Q}) = \arg \min_{\mathbf{Q}_2} \|\mathbf{Q}_2 - \mathbf{Q}\|_{\mathbf{F}}, \text{ s.t. } \mathbf{Q}_2 \geq 0. \quad (4)$$

Both of the two subprojections have closed-formed solutions [1] and the von Neumann successive projection lemma [2] guarantees the successive projection converges to the optimum.

### A.2 Convergence Rate Proof

**Remark 1.** The algorithm to solve the alignment matrix  $\mathbf{P}_i$  converges at rate  $\frac{1}{2} + \lambda \|(\mathbf{S}_1 \otimes \mathbf{S}_2)\|_{\mathbf{F}}$ .

*Proof.* By denoting  $\mathbf{R}^{(t)} = (\mathbf{K}^\top + 2\lambda \mathbf{S}_2 \mathbf{P}^{(t)} \mathbf{S}_1^\top)$ , it is easy to show that  $\|\mathbf{R}^{(t)} - \mathbf{R}^{(t-1)}\|_{\mathbf{F}} \geq \|\mathbf{\Gamma}(\mathbf{R}^{(t)}) - \mathbf{\Gamma}(\mathbf{R}^{(t-1)})\|_{\mathbf{F}}$ . Then, we have that  $\|\mathbf{P}^{(t+1)} - \mathbf{P}^{(t)}\|_{\mathbf{F}} \leq \frac{1}{2} \|\mathbf{P}^{(t)} - \mathbf{P}^{(t-1)}\|_{\mathbf{F}} + \frac{1}{2} \|\mathbf{R}^{(t)} - \mathbf{R}^{(t-1)}\|_{\mathbf{F}}$  and  $\|\mathbf{R}^{(t)} - \mathbf{R}^{(t-1)}\|_{\mathbf{F}} = 2\lambda \|\mathbf{S}_2 \mathbf{P}^{(t)} \mathbf{S}_1^\top - \mathbf{S}_2 \mathbf{P}^{(t-1)} \mathbf{S}_1^\top\|_{\mathbf{F}} = 2\lambda \|(\mathbf{S}_1 \otimes \mathbf{S}_2) \text{vec}(\mathbf{P}^{(t)} - \mathbf{P}^{(t-1)})\|_2 \leq 2\lambda \|(\mathbf{S}_2 \otimes \mathbf{S}_1)\|_{\mathbf{F}} \|\mathbf{P}^{(t)} - \mathbf{P}^{(t-1)}\|_{\mathbf{F}}$ . Therefore we can obtain that  $\frac{\|\mathbf{P}^{(t+1)} - \mathbf{P}^{(t)}\|_{\mathbf{F}}}{\|\mathbf{P}^{(t)} - \mathbf{P}^{(t-1)}\|_{\mathbf{F}}} \leq \frac{1}{2} + \lambda \|(\mathbf{S}_1 \otimes \mathbf{S}_2)\|_{\mathbf{F}}$ .  $\square$

### A.3 Experimental setting

By the way, all the experimental environment are implemented on a desktop computer with an Intel Core i7-7820X CPU and 64GB RAM, MATLAB 2020b (64-bit).

## 24 A.4 More Experimental Results

25 In this section, we report in Table 1 the comparison of the clustering performance of LMVSC and our  
26 proposed FMVACC before and after using the anchor alignment module.

27 **Effect of Alignment Module:** We further verify the effect of the proposed alignment module through  
28 experiments on real-world datasets. Different from the experiments in the main text, we use two  
29 others commonly used clustering effect evaluation indicators, namely NMI and Fscore, for evaluation.  
30 From the results in Table 1, we can notice that the clustering performance of the LMVSC algorithm  
31 and our FMVACC is greatly improved by utilizing the alignment module for column alignment.  
32 Specifically, in terms of NMI, LMVSC-Aligned achieves 14.46 % (UCI-Digit) and 8.70 % (BDGP)  
33 progress compared to its own original version. In terms of Fscore, compared with the FMVACC  
34 without the alignment module, FMVACC-Aligned achieves 8.52 % (BDGP) and 6.80 % (YTF-10)  
35 progress.

Table 1: Other Clustering performance on the seven benchmarks. 'OM' indicates the out-of-memory failure.

| Datasets   | Samples | LMVSC-Unaligned | LMVSC-Aligned     | Proposed-Unaligned | Proposed-Aligned  |
|------------|---------|-----------------|-------------------|--------------------|-------------------|
| NMI (%)    |         |                 |                   |                    |                   |
| 3-Sources  | 169     | 26.38±0.42      | <b>27.66±4.04</b> | 43.95±3.17         | <b>56.85±5.44</b> |
| UCI-Digit  | 2000    | 64.89±1.57      | <b>79.35±1.97</b> | 77.81±2.40         | <b>84.33±2.37</b> |
| BDGP       | 2500    | 18.17±0.07      | <b>26.87±0.12</b> | 27.35±2.53         | <b>36.81±2.69</b> |
| SUNRGBD    | 10335   | 18.76±0.14      | <b>24.22±0.23</b> | 17.91±0.55         | <b>19.88±0.61</b> |
| MNIST      | 60000   | 94.06±1.49      | <b>96.45±1.41</b> | 95.90±0.65         | <b>96.74±0.75</b> |
| YTF-10     | 38654   | 74.71±1.41      | <b>75.87±1.48</b> | 75.55±2.42         | <b>77.13±1.87</b> |
| YTF-20     | 63896   | 74.63±0.82      | <b>75.90±1.30</b> | <b>78.94±1.23</b>  | 78.47±1.01        |
| Fscore (%) |         |                 |                   |                    |                   |
| 3-Sources  | 169     | 39.17±0.54      | <b>41.33±2.77</b> | 47.21±4.51         | <b>54.71±7.67</b> |
| UCI-Digit  | 2000    | 57.62±2.17      | <b>75.56±4.59</b> | 73.35±3.95         | <b>83.33±4.29</b> |
| BDGP       | 2500    | 32.10±0.04      | <b>40.11±0.18</b> | 35.73±2.37         | <b>44.25±2.43</b> |
| SUNRGBD    | 10335   | 8.84±0.14       | <b>11.01±0.23</b> | 10.74±0.32         | <b>12.94±0.29</b> |
| MNIST      | 60000   | 95.36±2.70      | <b>96.97±3.05</b> | 97.03±1.52         | <b>97.65±1.68</b> |
| YTF-10     | 38654   | 65.26±2.06      | <b>66.88±2.47</b> | 64.49±3.72         | <b>71.29±4.22</b> |
| YTF-20     | 63896   | 57.87±1.37      | <b>60.80±2.52</b> | <b>66.51±3.24</b>  | 66.40±2.16        |

## 36 A.5 Parameter sensitivity

37 There are two parameters to tune, including the number of anchors  $m$  and the balanced parameter  
38  $\lambda$ . To illustrate the impact of these two parameters on performance, we conduct a comparative  
39 experiment on six datasets shown in Fig. 1. For  $\lambda$ , we select 0.0001, 1, 10000 and positive infinity  
40 from small to large, indicating the effect of structure correspondence. For the number of anchors, we  
41 respectively let  $m$  be  $k$ ,  $2k$ , and  $5k$ , where  $k$  is the number of clusters. It can be seen from (a) and (b)  
42 that when the number of anchors is constant, the clustering performance increases with the decrease  
43 of the effect of structure correspondence. As can be seen from (d) and (e), when  $m$  is fixed, for the  
44 MNIST dataset,  $m = 2k$  works best, while on YTF-10,  $m = 2k$  achieves the best performance.

## 45 References

- 46 [1] Yao Lu, Kaizhu Huang, and Cheng-Lin Liu. A fast projected fixed-point algorithm for large  
47 graph matching. *Pattern Recognition*, 60:971–982, 2016.
- 48 [2] John Von Neumann. *Functional operators: The geometry of orthogonal spaces*, volume 2.  
49 Princeton University Press, 1951.

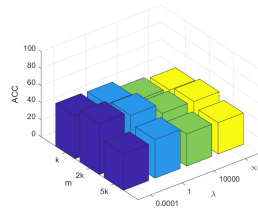

(a) 3-Sources

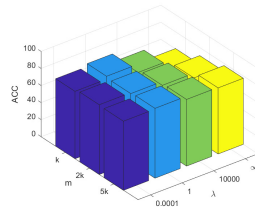

(b) UCI-Digit

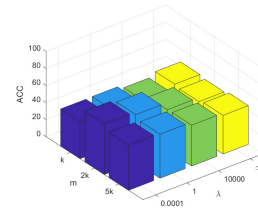

(c) BDGP

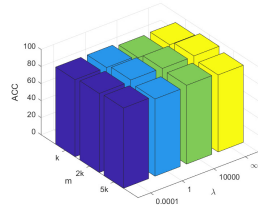

(d) MNIST

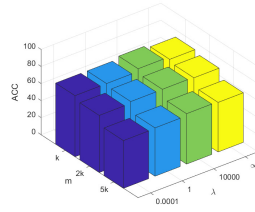

(e) YTF-10

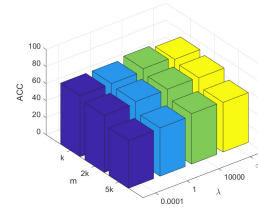

(f) YTF-20

Figure 1: The sensitivity of our proposed method on benchmark datasets.
